# Supplementary material
Source: MDPI journal article supplement (https://www.mdpi.com/2073-4441/13/15/2116)
Supplement: s1 [file s1]

## List of Supplementary Materials

**Table S1** Random consistency index table

**Table S2** Basis for qualitative index evaluation

**Figure S1** Reduction of COD<sub>Cr</sub> in Fuhe estuarine wetland (a: pre-ecological sedimentation pond; b: subsurface flow constructed wetland; c: macrophyte pond)

**Figure S2** Reduction of NH<sub>3</sub>-N in Fuhe estuarine wetland (a: pre-ecological sedimentation pond; b: subsurface flow constructed wetland; c: macrophyte pond)

**Figure S3** Reduction of TP in Fuhe estuarine wetland (a: pre-ecological sedimentation pond; b: subsurface flow constructed wetland; c: macrophyte pond)

**Table S1** Random consistency index table

| n    | 1    | 2    | 3    | 4    | 5    | 6    | 7    | 8    | 9    |
|------|------|------|------|------|------|------|------|------|------|
| R.I. | 0.00 | 0.00 | 0.58 | 0.90 | 1.12 | 1.24 | 1.32 | 1.41 | 1.45 |

**Table S2** Basis for qualitative index evaluation

| Index                                | 1                                                                                                                                                                       | 2                                                                                                                         | 3                                                                            | 4                                                                                                                                                 | 5                                                                                                                                                             |
|--------------------------------------|-------------------------------------------------------------------------------------------------------------------------------------------------------------------------|---------------------------------------------------------------------------------------------------------------------------|------------------------------------------------------------------------------|---------------------------------------------------------------------------------------------------------------------------------------------------|---------------------------------------------------------------------------------------------------------------------------------------------------------------|
| Habitat type and structure diversity | The habitat is single, the species diversity is poor, and the ecosystem is easily destroyed by external influences.                                                     | The habitat is single, easily damaged, and the ecosystem is not stable enough.                                            | Combination of multiple habitats, the stability of the ecosystem is average. | Multi-habitat combination, abundant species, good material circulation, and stable ecosystem.                                                     | Combination of multiple habitats, high biodiversity, good material circulation, stable ecosystem, and strong self-repair ability.                             |
| Technical advancement                | The technology used has not improved in terms of treatment effect, cost, project life, etc. It is an old technology in the field of ecological restoration engineering. | It is an old technology in the field of ecological restoration engineering, but it has better improvements in one aspect. | The technology used is the most common technology at the current stage.      | There have been better improvements in water quality treatment effects, economic costs, maintenance costs, ecological restoration, and longevity. | The technology uses the latest theories in the field, and has made better improvements in all aspects, or has made breakthrough improvements in some aspects. |
| Technical maturity                   | The technology has not been tested or                                                                                                                                   | The technology has been verified in a                                                                                     | The technology has been applied in many                                      | In actual application, the technology                                                                                                             | In the application of technology in engineering, it                                                                                                           |

|                         |                                                                                                                                                                              |                                                                                                                                                                                                              |                                                                                                                                                                          |                                                                                                                         |                                                                                                                                                                                                       |
|-------------------------|------------------------------------------------------------------------------------------------------------------------------------------------------------------------------|--------------------------------------------------------------------------------------------------------------------------------------------------------------------------------------------------------------|--------------------------------------------------------------------------------------------------------------------------------------------------------------------------|-------------------------------------------------------------------------------------------------------------------------|-------------------------------------------------------------------------------------------------------------------------------------------------------------------------------------------------------|
|                         | analyzed in detail, and has not been applied to the engineering scale.                                                                                                       | simulation environment close to reality, and has a certain degree of adaptability and stability. Most of the functions and technical indicators basically meet the actual requirements.                      | projects, and the function basically meets the requirements of the project, which can be further improved through improvement.                                           | reached a stable state, and no obvious problems appeared in the test verification.                                      | can fully meet engineering needs and possess stable capabilities.                                                                                                                                     |
| Engineering operability | The objective conditions such as geography, geology and hydrology do not meet the conditions of project construction, and the construction of the project is very difficult. | In some aspects of geology, economy, and hydrology, it will hinder the construction of the project.                                                                                                          | The local geology, geography and other conditions basically require the construction of a complex project, and the project can be constructed.                           | The local area meets the project construction conditions and can play a role in promoting it in some aspects.           | The local geology and geographical conditions are conducive to the construction of the project.                                                                                                       |
| Engineering stability   | After the long-term operation of the project, the treatment effect is quite different from the expected, and it fails to meet the design requirements.                       | After long-term operation, the effect of pollutant reduction gradually declined, the effect of the project did not reach the expected effect, and the management and maintenance did not meet the standards. | The project is relatively stable, the water quality treatment effect has basically reached the expected setting, and management and maintenance are proceeding normally. | The project is stable, and the water quality treatment effect can run for a long time with the expected setting effect. | The project is stable, the water quality treatment effect is better than the expected setting effect and can run stably for a long time, and the management and maintenance are carried out normally. |
| Maintenance             | The                                                                                                                                                                          | Engineering                                                                                                                                                                                                  | Engineering                                                                                                                                                              | Engineering                                                                                                             | The engineering                                                                                                                                                                                       |

|            |                                                                                                                                                                                                                                                                                                                                                                                                                                                                                                                                         |                                                                                                                                                                                                                                                                                                                |                                                                                                                                                                                                                                                                                             |                                                                                                                                                                                                                                                                                                                                                                             |                                                                                                                                                                                                                                                                                                                                                                                                                                  |
|------------|-----------------------------------------------------------------------------------------------------------------------------------------------------------------------------------------------------------------------------------------------------------------------------------------------------------------------------------------------------------------------------------------------------------------------------------------------------------------------------------------------------------------------------------------|----------------------------------------------------------------------------------------------------------------------------------------------------------------------------------------------------------------------------------------------------------------------------------------------------------------|---------------------------------------------------------------------------------------------------------------------------------------------------------------------------------------------------------------------------------------------------------------------------------------------|-----------------------------------------------------------------------------------------------------------------------------------------------------------------------------------------------------------------------------------------------------------------------------------------------------------------------------------------------------------------------------|----------------------------------------------------------------------------------------------------------------------------------------------------------------------------------------------------------------------------------------------------------------------------------------------------------------------------------------------------------------------------------------------------------------------------------|
| complexity | <p>maintenance of the project requires a lot of people, the automatic maintenance is low, and the materials and equipment required for maintenance are many and difficult to obtain.</p> <p>The project did not consider the degree of adaptation to the local landscape, the integration of the landscape was poor, and the scenery was abrupt.</p> <p>The construction of the project has reduced the surrounding economic level (the number and quality of industries, employment, etc.), which has caused a restraining effect.</p> | <p>maintenance requires more than 30 people, and the required materials and equipment are difficult to obtain.</p> <p>Poor integration between the project and the surrounding landscape and the scenery is abrupt.</p> <p>The construction of the project has slightly inhibited the surrounding economy.</p> | <p>maintenance needs 10-30 people, which can realize the mechanization and automation of maintenance, and the maintenance cycle is long.</p> <p>The integration of engineering and landscape is general and not obtrusive.</p> <p>The project has no impact on the surrounding economy.</p> | <p>maintenance needs 5-10 people, the maintenance cycle is short, can be mechanized and automated, the equipment is simple to operate, and the materials are easy to obtain.</p> <p>The project slightly improves the surrounding landscape.</p> <p>The project slightly promoted the surrounding economy, including providing jobs and driving the surrounding market.</p> | <p>maintenance is convenient, it can be realized by only 5 people or less, the maintenance period is short, and the degree of mechanization and automation is high.</p> <p>The project is well integrated with the surrounding landscape, which greatly improves the surrounding viewing degree.</p> <p>The project has promoted the surrounding industries and greatly promoted the improvement of the surrounding economy.</p> |
|------------|-----------------------------------------------------------------------------------------------------------------------------------------------------------------------------------------------------------------------------------------------------------------------------------------------------------------------------------------------------------------------------------------------------------------------------------------------------------------------------------------------------------------------------------------|----------------------------------------------------------------------------------------------------------------------------------------------------------------------------------------------------------------------------------------------------------------------------------------------------------------|---------------------------------------------------------------------------------------------------------------------------------------------------------------------------------------------------------------------------------------------------------------------------------------------|-----------------------------------------------------------------------------------------------------------------------------------------------------------------------------------------------------------------------------------------------------------------------------------------------------------------------------------------------------------------------------|----------------------------------------------------------------------------------------------------------------------------------------------------------------------------------------------------------------------------------------------------------------------------------------------------------------------------------------------------------------------------------------------------------------------------------|

---

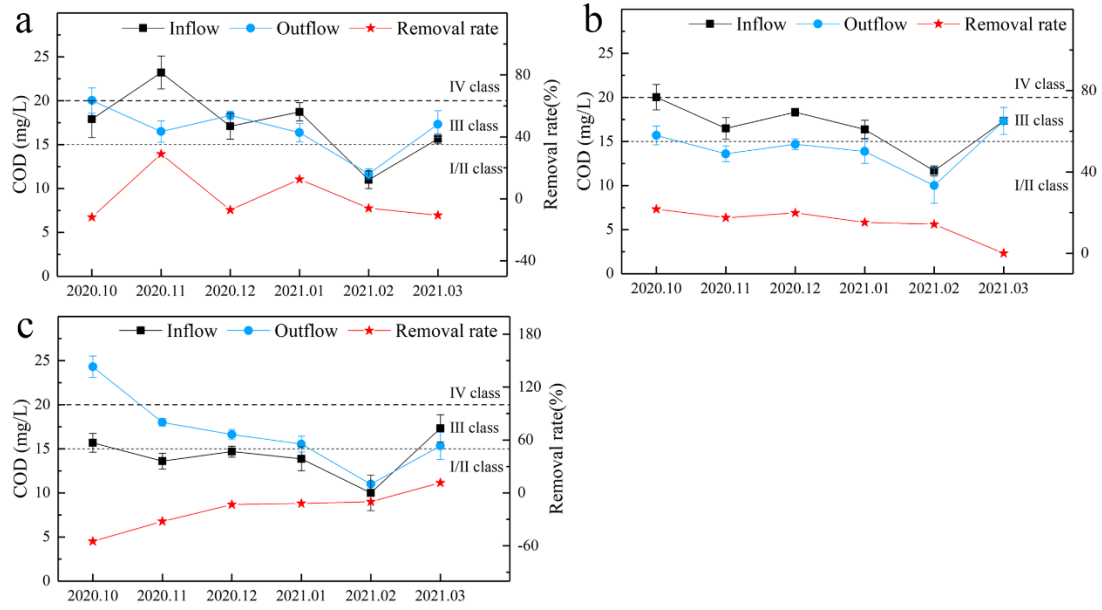

**Figure S1** Reduction of COD<sub>Cr</sub> in Fuhe estuarine wetland (a: pre-ecological sedimentation pond; b: subsurface flow constructed wetland; c: macrophyte pond)

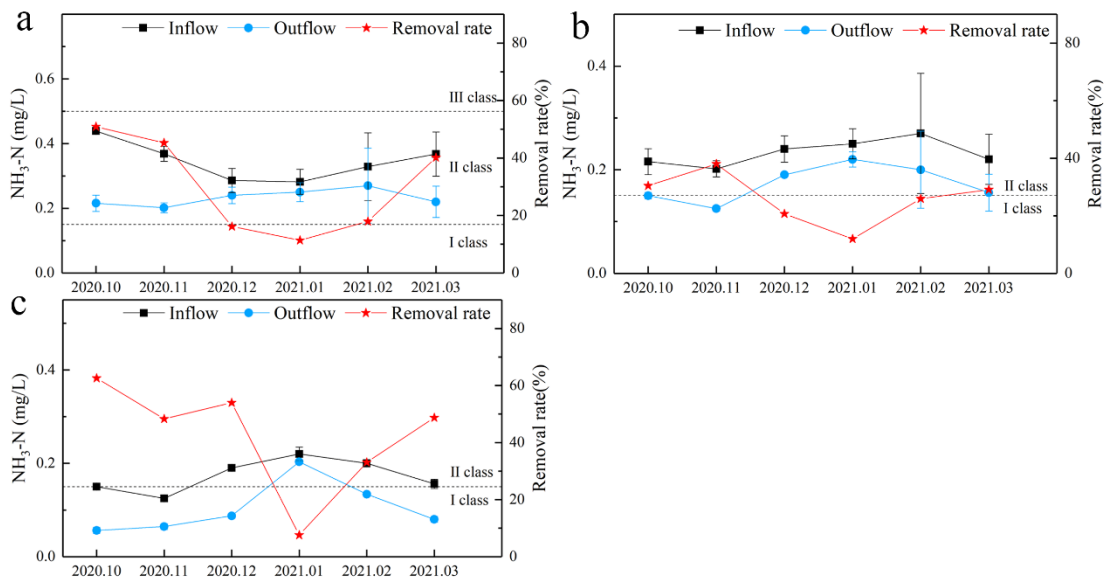

**Figure S2** Reduction of NH<sub>3</sub>-N in Fuhe estuarine wetland (a: pre-ecological sedimentation pond; b: subsurface flow constructed wetland; c: macrophyte pond)

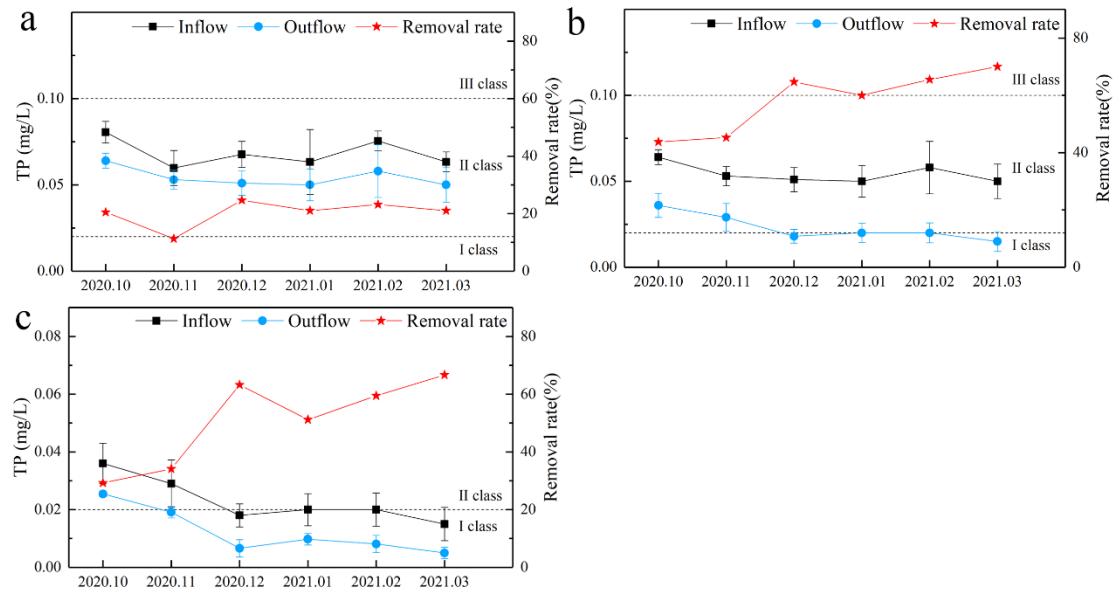

**Figure S3** Reduction of TP in Fuhe estuarine wetland (a: pre-ecological sedimentation pond; b: subsurface flow constructed wetland; c: macrophyte pond)
